# Supplementary material for: Defect Induced Polarization Loss in Multi‐Shelled Spinel Hollow Spheres for Electromagnetic Wave Absorption Application
Source: PubMed Central journal article supplement (PMC8061380; doi:10.1002/advs.202004640), 2021-02-08
Supplement: ADVS-8-2004640-s001.pdf [file ADVS-8-2004640-s001.pdf]

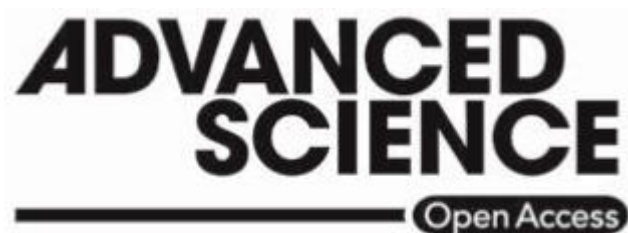

## Supporting Information

for *Adv. Sci.*, DOI: 10.1002/advs.202004640

# Defect Induced Polarization Loss in Multi-shelled Spinel Hollow Spheres for Electromagnetic Wave Absorption Application

*Ming Qin, Limin Zhang, Xiaoru Zhao, Hongjing Wu\**

## Supplementary information:

### **Defect induced polarization loss in multi-shelled spinel hollow spheres for electromagnetic wave absorption application**

Ming Qin, Limin Zhang, Xiaoru Zhao, Hongjing Wu\*

MOE Key Laboratory of Material Physics and Chemistry under Extraordinary, School of Physical Science and Technology, Northwestern Polytechnical University, Xi'an

710072, China;

\*Corresponding author: [wuhongjing@nwpu.edu.cn](mailto:wuhongjing@nwpu.edu.cn) (H. Wu).

**Table S1** The products prepared by different bivalent metal ions

| Bivalent metal ions | Mg                             | Mn                             | Fe                                                                 | Ni                                      | Cu                                      | Zn                                      |
|---------------------|--------------------------------|--------------------------------|--------------------------------------------------------------------|-----------------------------------------|-----------------------------------------|-----------------------------------------|
| Products            | Co <sub>3</sub> O <sub>4</sub> | Co <sub>3</sub> O <sub>4</sub> | FeCo <sub>2</sub> O <sub>4</sub><br>Co <sub>3</sub> O <sub>4</sub> | NiO<br>NiCo <sub>2</sub> O <sub>4</sub> | CuO<br>CuCo <sub>2</sub> O <sub>4</sub> | ZnO<br>ZnCo <sub>2</sub> O <sub>4</sub> |

**Table S2** The calculated results of the Co<sup>2+</sup> ratios and oxygen vacancies form XPS

peak areas

| Samples | Co <sup>2+</sup> /% | Co <sup>3+</sup> /% | Co <sup>2+</sup> /<br>Co <sup>3+</sup> | Ni <sup>2+</sup> /% | Ni <sup>3+</sup> /% | Oxygen<br>vacancy/% |
|---------|---------------------|---------------------|----------------------------------------|---------------------|---------------------|---------------------|
| NCO-500 | 72.9                | 27.1                | 2.70                                   | 59.3                | 40.7                | 32.3                |
| NCO-600 | 72.6                | 27.4                | 2.66                                   | 54.0                | 46.0                | 31.5                |
| NCO-700 | 64.9                | 35.1                | 1.85                                   | 47.7                | 52.3                | 35.9                |

**Table S3** Work function of materials and their differences collected from reference

| Materials                            | Work function<br>(eV) | Work function<br>difference (eV) | Refs. |
|--------------------------------------|-----------------------|----------------------------------|-------|
| NiCo <sub>2</sub> O <sub>4</sub>     | 6.1                   | -                                | [50]  |
| NiO                                  | 5.4                   | -                                |       |
| NiO/NiCo <sub>2</sub> O <sub>4</sub> | -                     | 0.7                              |       |
| CuCo <sub>2</sub> O <sub>4</sub>     | 4.87                  | -                                | [52]  |
| CuO                                  | 5.31                  | -                                | [53]  |
| CuO/CuCo <sub>2</sub> O <sub>4</sub> | -                     | 0.44                             |       |
| ZnO                                  | 4.45                  | -                                | [51]  |
| ZnCo <sub>2</sub> O <sub>4</sub>     | 5.22                  | -                                |       |
| ZnO/ZnCo <sub>2</sub> O <sub>4</sub> | -                     | 0.77                             |       |

**Table S4** Comparison with our previously prepared NiCo<sub>2</sub>O<sub>4</sub>-based EM wave  
absorbing materials

| EM wave<br>absorbers                                        | Bandwidth<br>(GHz) | Thickness<br>(mm) | Density<br>(mg/cm <sup>-3</sup> ) | Refs.            |
|-------------------------------------------------------------|--------------------|-------------------|-----------------------------------|------------------|
| NiCo <sub>2</sub> O <sub>4</sub><br>nanosheet               | 4.28               | 1.39              | 137                               | [12]             |
| NCO-S                                                       | 5.44               | 1.8               | 243                               |                  |
| NCO-P                                                       | 4.64               | 1.6               | 106                               | [14]             |
| NCO-C                                                       | 4.96               | 1.9               | 120                               |                  |
| NiCo <sub>2</sub> O <sub>4</sub>                            | 6.08               | 2.06              | 409                               | [18]             |
| NiO/NiCo <sub>2</sub> O <sub>4</sub><br>microrod            | 6.08               | 1.88              | 294                               | [11]             |
| NiCo <sub>2</sub> O <sub>4</sub>                            | 7.44               | 2.1               | 478                               | [62]             |
| <b>Multi-shelled</b>                                        |                    |                   |                                   |                  |
| <b>NiO/NiCo<sub>2</sub>O<sub>4</sub><br/>hollow spheres</b> | <b>5.84</b>        | <b>1.86</b>       | <b>41.1</b>                       | <b>This work</b> |

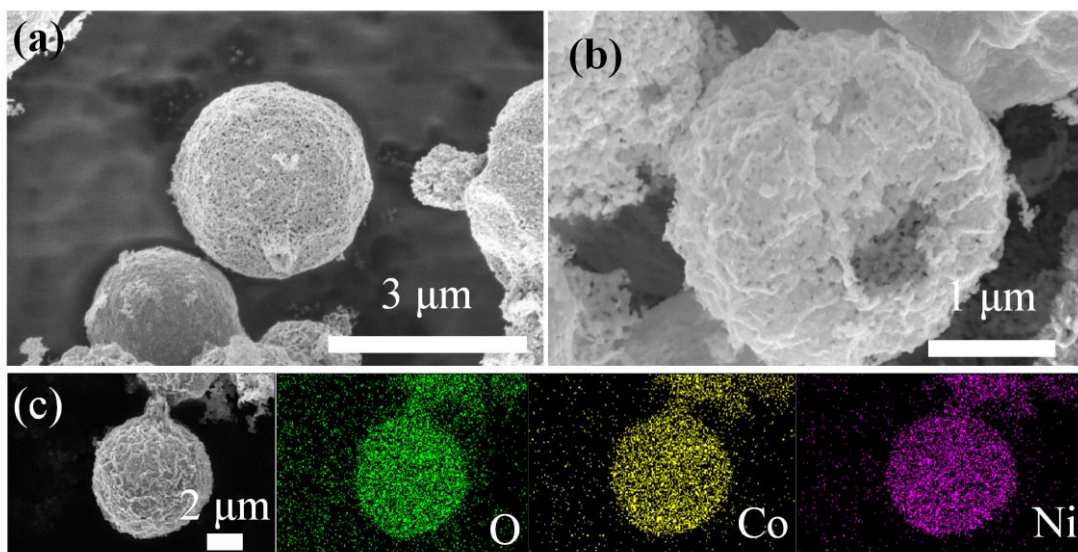

**Fig. S1** SEM images and EDS mapping of NCO-550.

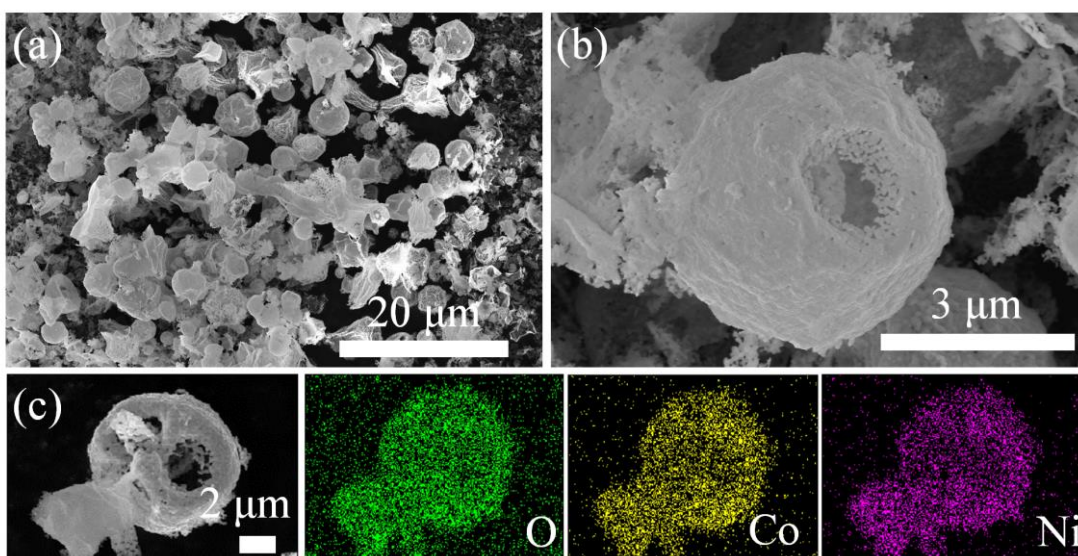

**Fig. S2** SEM images and EDS mapping of NCO-650.

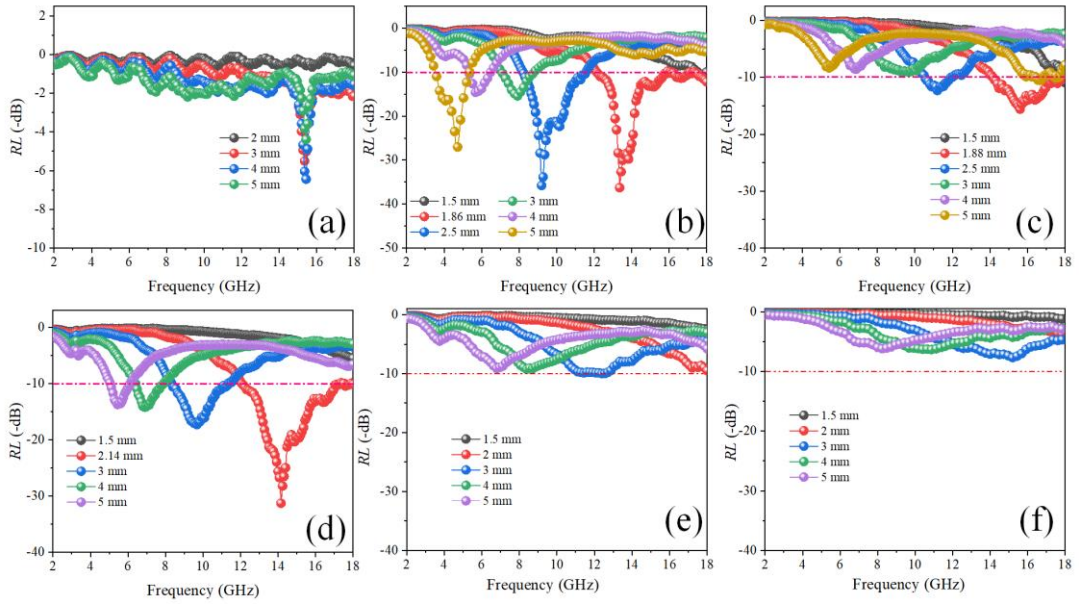

**Fig. S3**  $RL$  values of (a)  $\text{NiCo}_2\text{O}_4$  precursors, (b) NCO-500, (c) NCO-550, (d) NCO-600, (e) NCO-650 and (f) NCO-700 as a function of frequency.

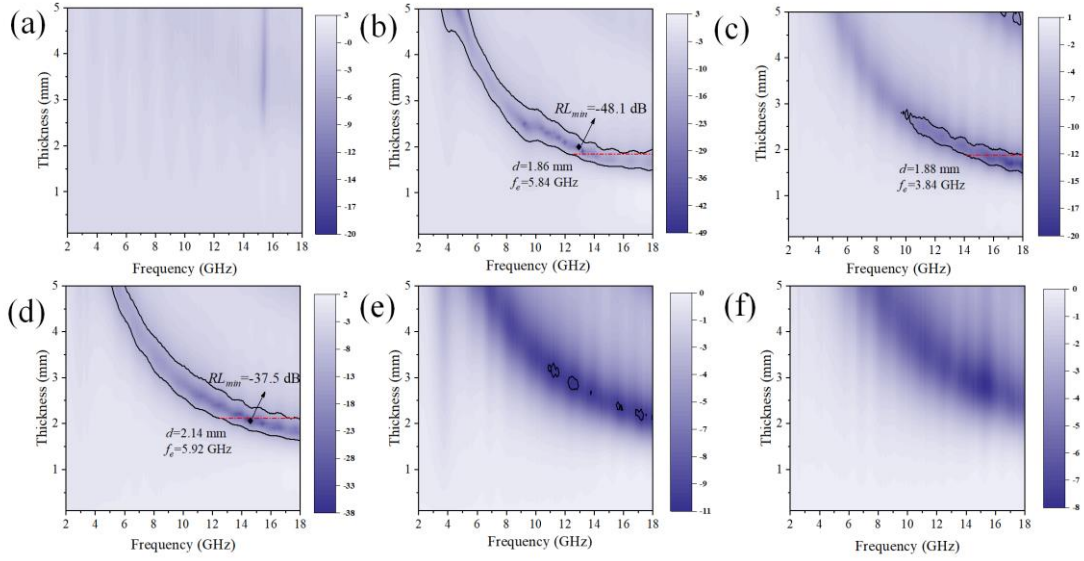

**Fig. S4** 2D plot of (a)  $\text{NiCo}_2\text{O}_4$  precursors, (b) NCO-500, (c) NCO-550, (d) NCO-600, (e) NCO-650 and (f) NCO-700 as a function of frequency.

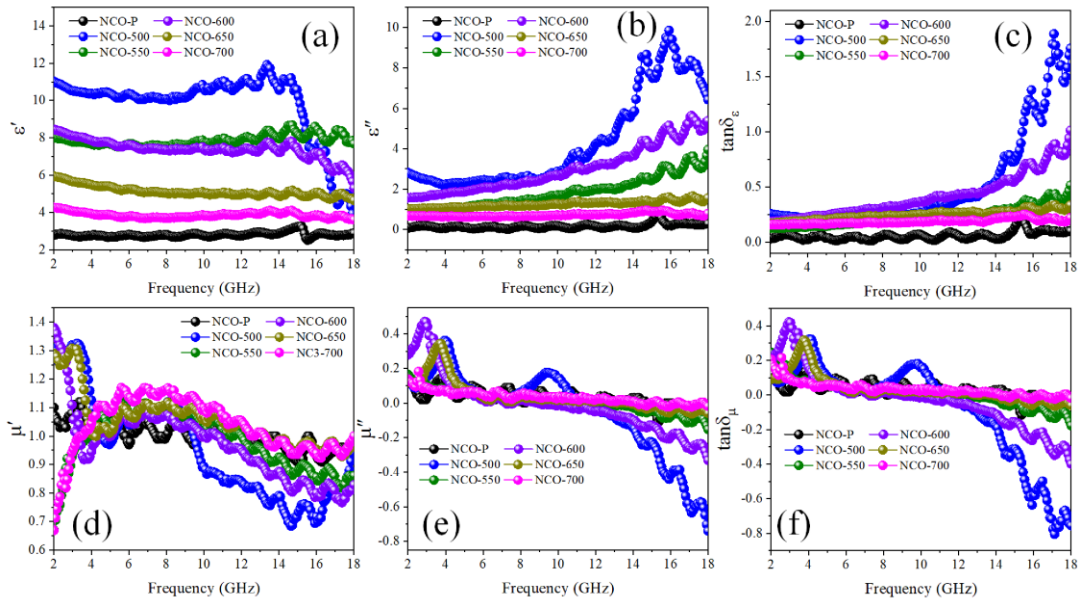

**Fig. S5** (a) The real part and (b) imaginary part of complex permittivity, (c) the dielectric loss tangent, the (d) real part, (e) imaginary part of complex permeability, (f) the magnetic loss tangent of the as-obtained NCO samples.

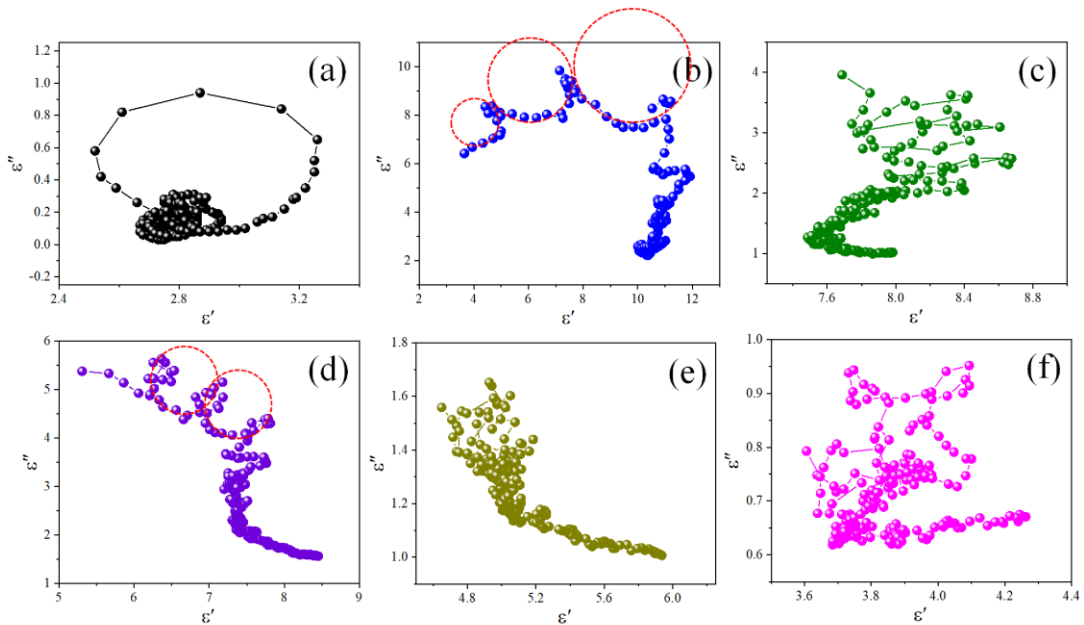

**Fig. S6** Cole-Cole semicircles of (a) NiCo<sub>2</sub>O<sub>4</sub> precursors, (b) NCO-500, (c) NCO-550, (d) NCO-600, (e) NCO-650 and (f) NCO-700.



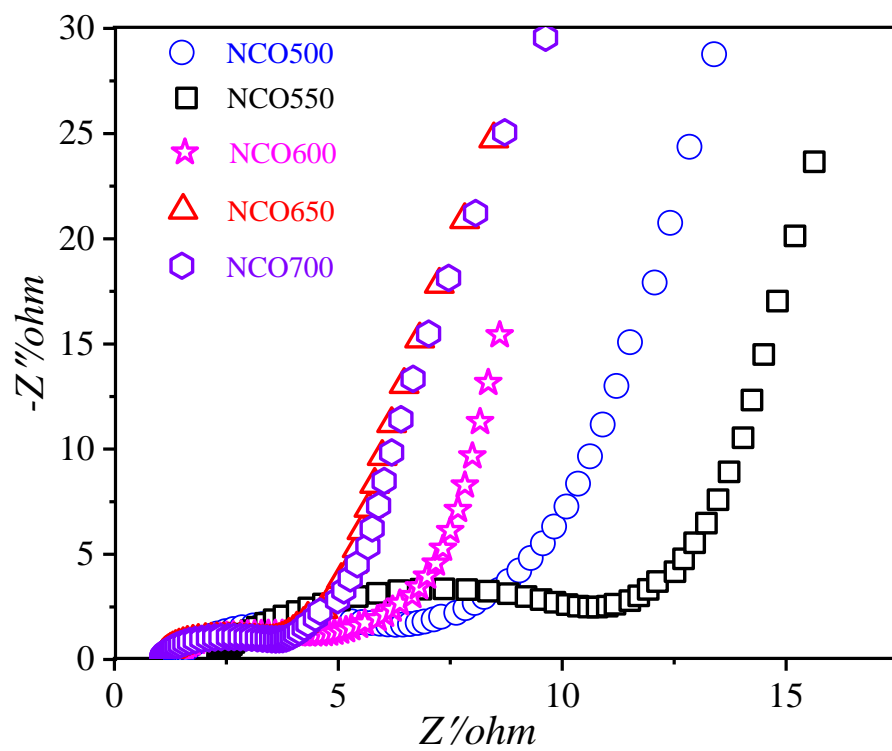

**Fig. S7** EIS curves of serial NCO samples.

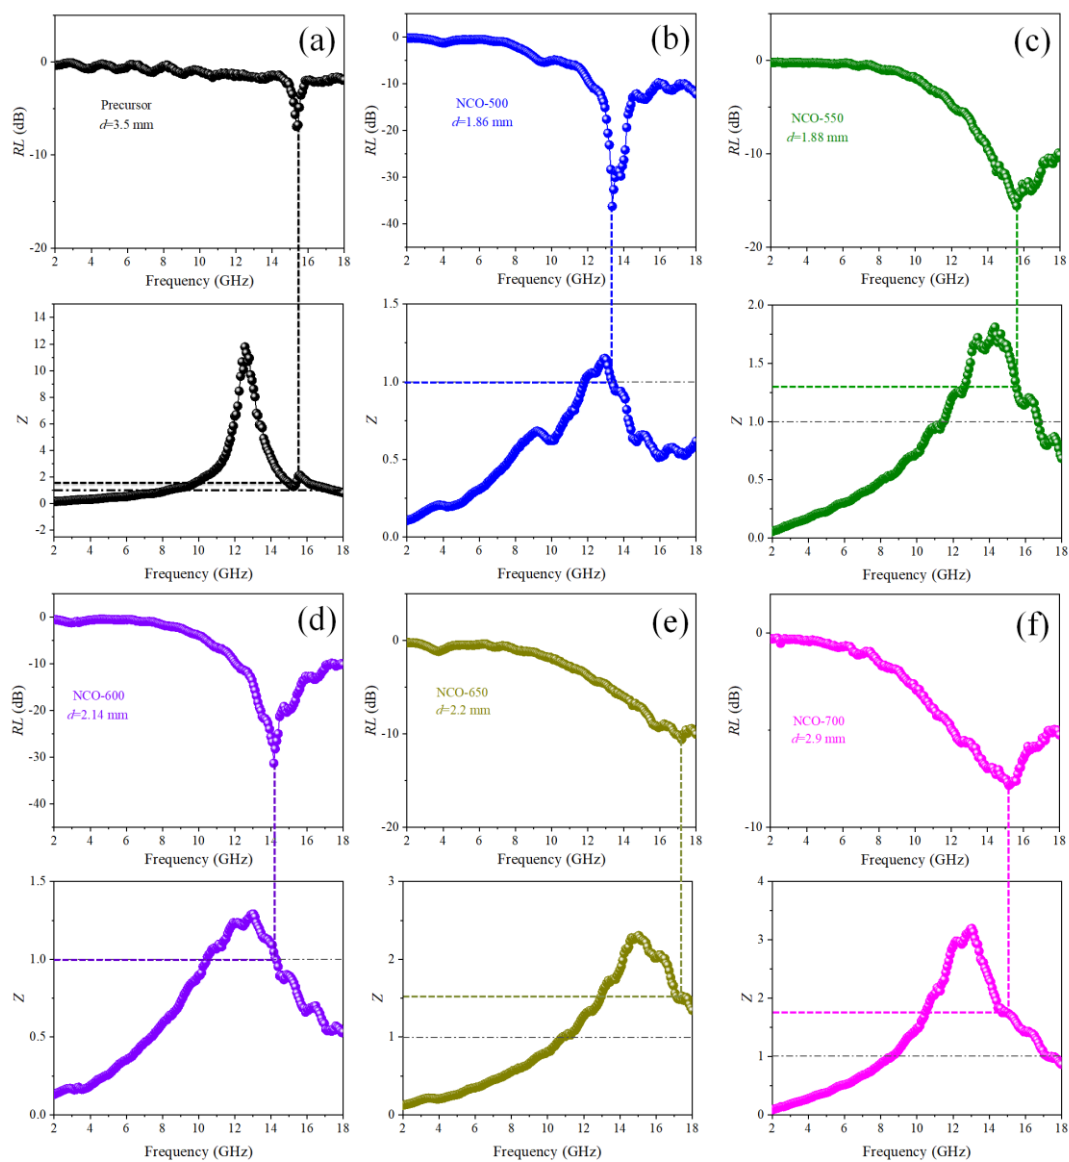

**Fig. S8** Normalized impedance matching characteristic of NCO samples.

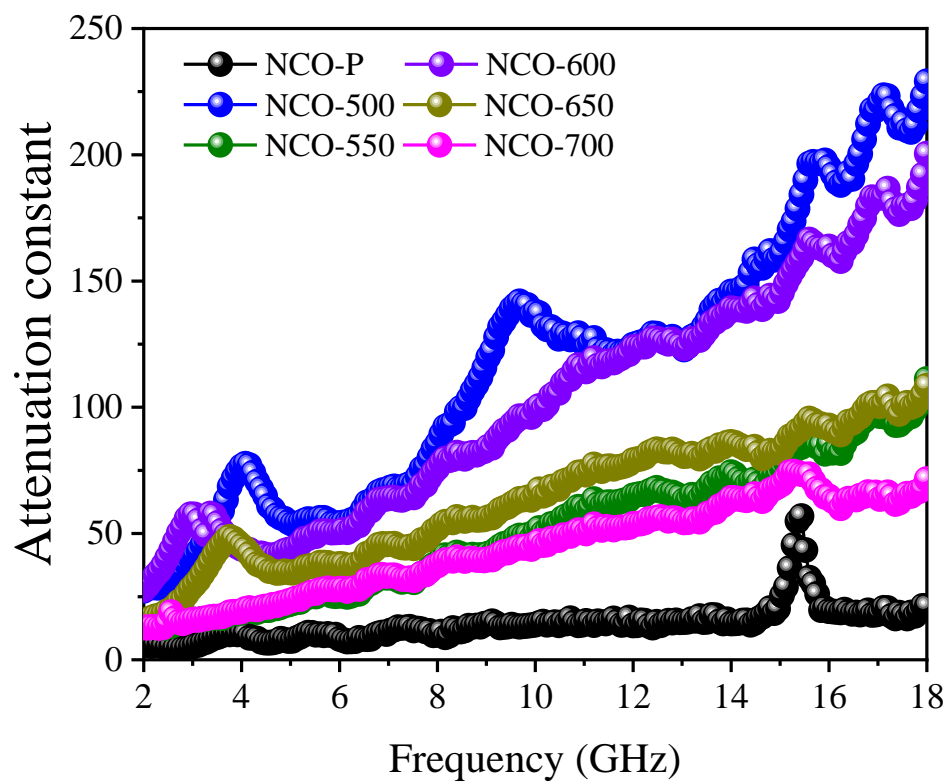

**Fig. S9** Attenuation constant of as-prepared NCO samples.

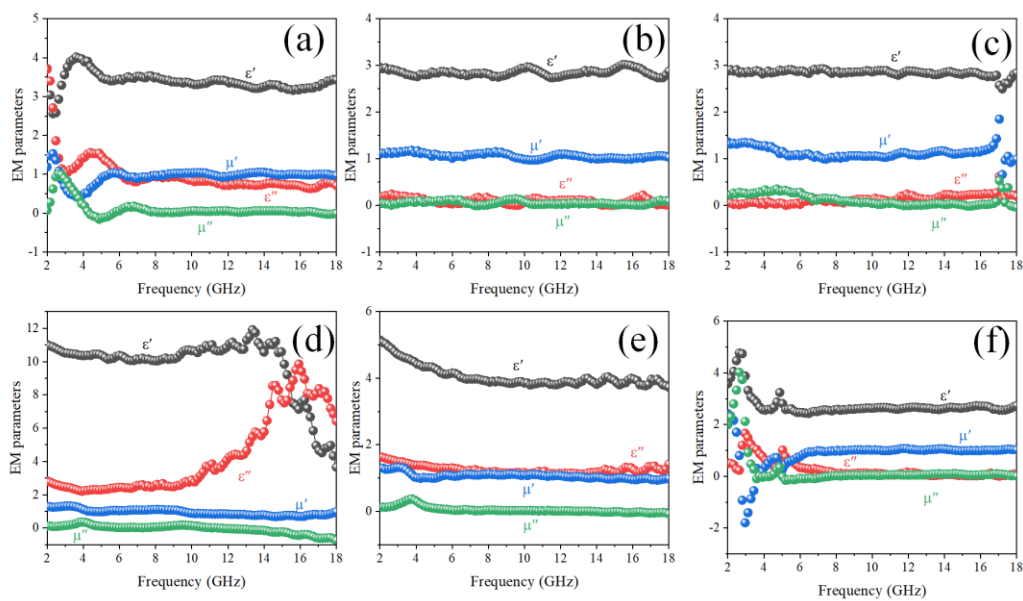

**Fig. S10** EM parameters of samples obtained from different divalent metal ions (a)

$\text{Mg}^{2+}$ , (b)  $\text{Mn}^{2+}$ , (c)  $\text{Fe}^{2+}$ , (d)  $\text{Ni}^{2+}$ , (e)  $\text{Cu}^{2+}$  and (f)  $\text{Zn}^{2+}$ .

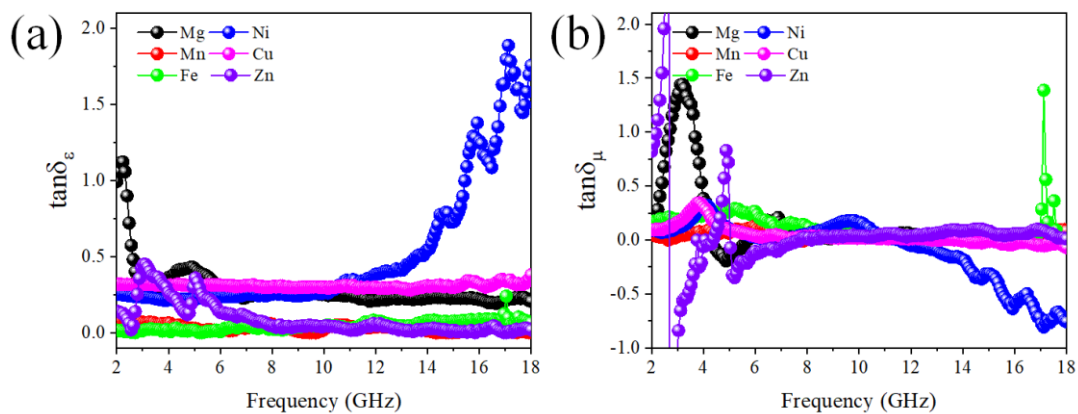

**Fig. S11** (a) the dielectric loss tangent and (b) the magnetic loss tangent of the

as-obtained samples.

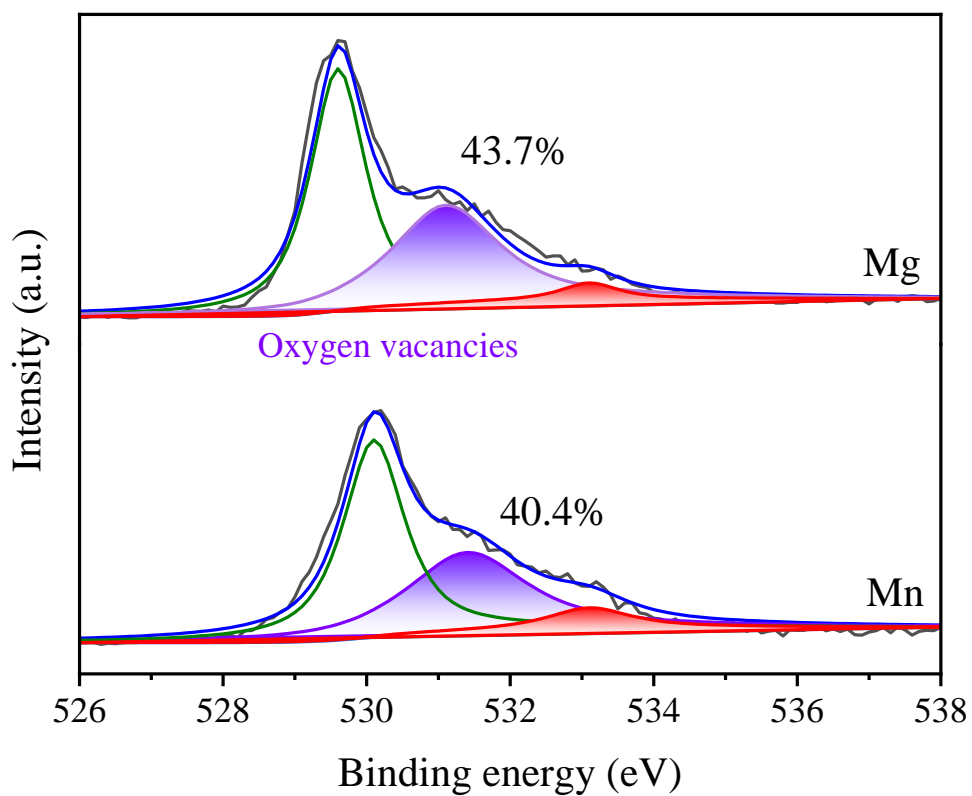

**Fig. S12** High-resolution XPS spectrum survey of O 1s of as-prepared samples obtained from divalent metal ions (a)  $\text{Mg}^{2+}$  and (b)  $\text{Mn}^{2+}$ .

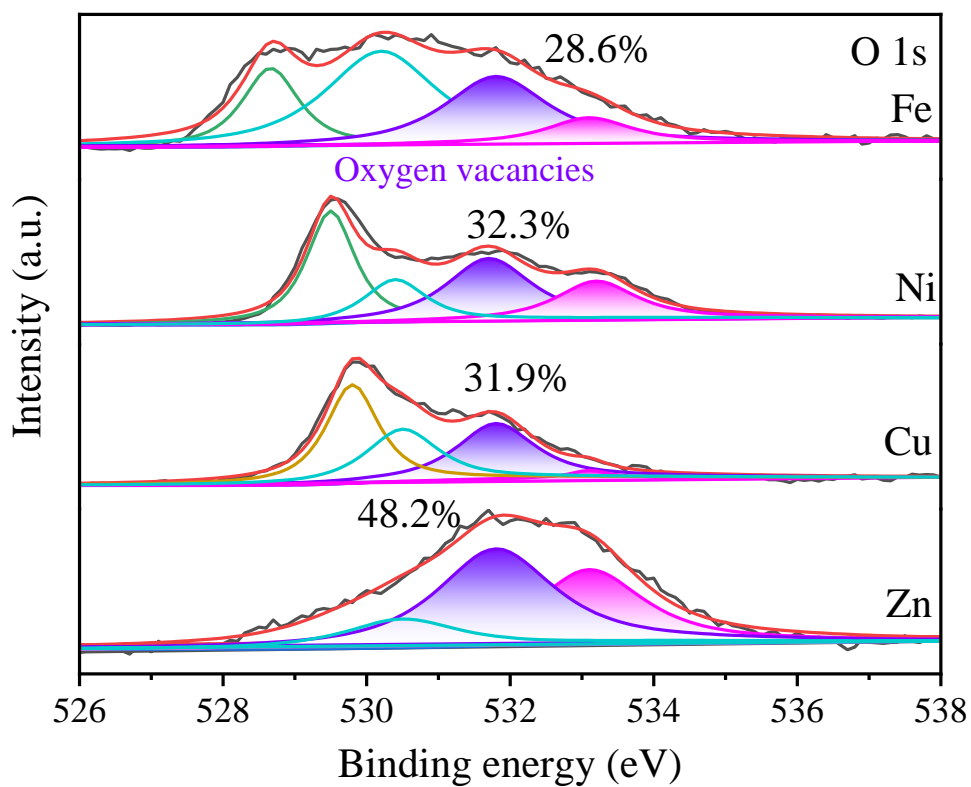

**Fig. S13** XPS spectrum survey of O 1s of as-prepared samples obtained from divalent metal ions  $\text{Fe}^{2+}$ ,  $\text{Ni}^{2+}$ , and  $\text{Cu}^{2+}$ .

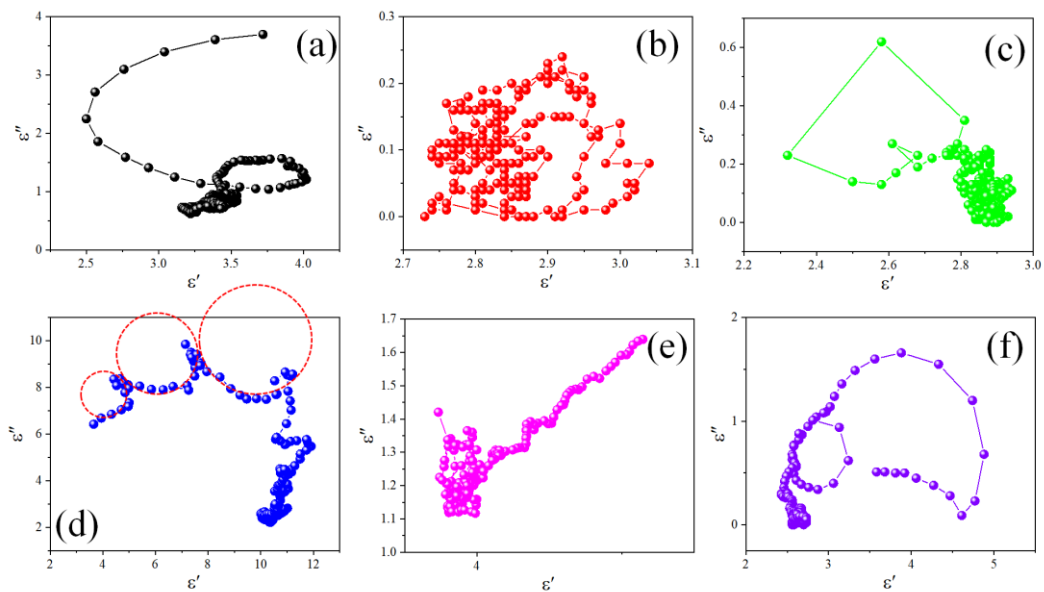

**Fig. S14** Cole-Cole semicircles of samples obtained from different divalent metal ions

(a)  $\text{Mg}^{2+}$ , (b)  $\text{Mn}^{2+}$ , (c)  $\text{Fe}^{2+}$ , (d)  $\text{Ni}^{2+}$ , (e)  $\text{Cu}^{2+}$  and (f)  $\text{Zn}^{2+}$ .
